# Supplementary material
Source: Springer Nature journal article supplement (https://www.springermedizin.de/resource/supplementary/13024_2013_576_MOESM5_ESM.pdf/9644336)

**A***GMR/+; +/+*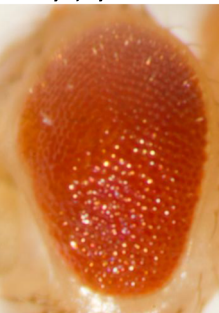*GMR/+;*  
*LRRK2(I202T)/+*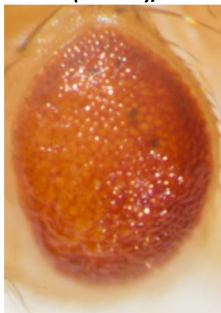*GMR/Vps26-RNAi; +/+*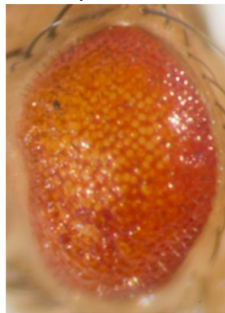*GMR/Vps26-RNAi;*  
*LRRK2(I202T)/+*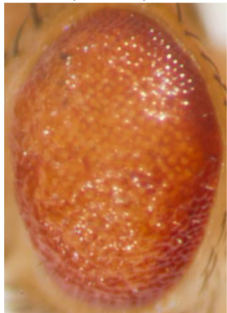**B**

% of eyes with a black lesion

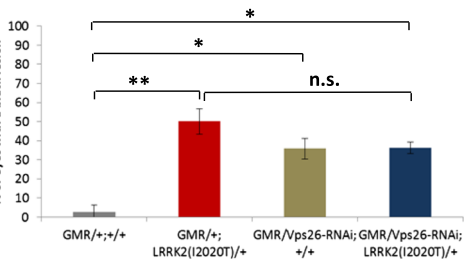**C**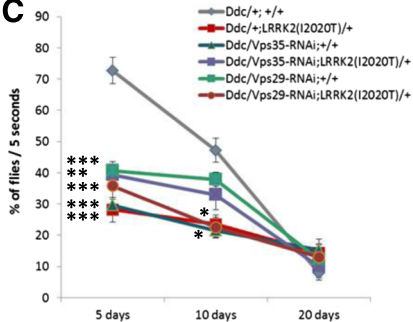

Supplement: MOESM5 [file 9644336]
